# Location of Zeros of Wiener and Distance Polynomials

Matthias Dehmer<sup>1\*</sup>, Aleksandar Ilić<sup>2</sup>

**1** Institute for Bioinformatics and Translational Research, UMIT - The Health and Lifesciences University Hall/Tyrol, Hall in Tyrol, Austria, **2** Faculty of Sciences and Mathematics, University of Niš, Niš, Serbia

## Abstract

The *geometry of polynomials* explores geometrical relationships between the zeros and the coefficients of a polynomial. A classical problem in this theory is to locate the zeros of a given polynomial by determining disks in the complex plane in which all its zeros are situated. In this paper, we infer bounds for general polynomials and apply classical and new results to graph polynomials namely Wiener and distance polynomials whose zeros have not been yet investigated. Also, we examine the quality of such bounds by considering four graph classes and interpret the results.

**Citation:** Dehmer M, Ilić A (2012) Location of Zeros of Wiener and Distance Polynomials. PLoS ONE 7(3): e28328. doi:10.1371/journal.pone.0028328

**Editor:** Guido Germano, Philipps-University Marburg, Germany

**Received:** July 23, 2011; **Accepted:** November 5, 2011; **Published:** March 16, 2012

**Copyright:** © 2012 Dehmer, Ilić. This is an open-access article distributed under the terms of the Creative Commons Attribution License, which permits unrestricted use, distribution, and reproduction in any medium, provided the original author and source are credited.

**Funding:** Matthias Dehmer thanks the Austrian Science Funds for supporting this work (project P22029-N13). Aleksandar Ilić is supported by the Research Grants 174010 and 174033 of the Serbian Ministry of Science. The funders had no role in study design, data collection and analysis, decision to publish, or preparation of the manuscript.

**Competing Interests:** The authors have declared that no competing interests exist.

\* E-mail: matthias.dehmer@umit.at

## Introduction

Numerous graph polynomials have been extensively studied and applied interdisciplinarily, see, e.g., [1–4]. Early contributions in this area deal with studying the well known independence polynomial [5] and chromatic polynomial [6]. Other graph polynomials such as the Omega polynomial and Cluj polynomial have been studied in [7]. Apart from this research, polynomials have been also employed in biologically driven disciplines. For instance, Emmert-Streib [8] tackled the challenging problem of calculating knot polynomials of secondary structure elements of proteins algorithmically. Related work can be also found in [8]. Interestingly, the development of so-called topological indices such as the well-known Wiener index [9] has triggered exploring graph polynomials too. For instance, Yan et al. [10] examined how the Wiener index changes under certain graph operations and extended their results to Wiener polynomials. Zadeh et al. [11] also investigated Wiener-type invariants of some graph operations. But note that the first paper exploring the change of the Wiener number upon operations on graphs has been contributed by Polansky and Bonchev [12]. Further, formulas for the Wiener polynomial of  $k$ -th power graphs have been investigated [13] when considering special graph classes such as paths, cycles and hypercubes (see also Theorem (1)).

In general, graph polynomials have been developed for measuring combinatorial graph invariants and for characterizing graphs. The latter problem has been studied in structural chemistry where the polynomials have been derived from chemical graphs [1,3]. There, graphs have been characterized by several graph polynomials [14] to solve problems in the Hückel-molecular orbital theory and in the theory of aromaticity, see [3,15]. Another intriguing field deals with investigating graph measures derived from the zeros of a graph polynomial. Seminal work has been done by Lovász et al. [16] as they explored the meaning of the largest eigenvalue of trees. Particularly they found that the leading positive eigenvalue of the characteristic polynomial can be used as

a measure for detecting branching of trees. Related concepts of branching based on using the eigenvalues of a graph have been studied by Randić et al. [17] and Bonchev [18].

Later, Randić et al. [17] surveyed further eigenvalue-based measures such as the sum of the positive eigenvalues, the multiplicity of the zero eigenvalue and other spectral indices [17,19]. Also, Dehmer et al. [20] recently developed novel spectral measures that turned to be unique for several graph classes. Altogether this shows that graph polynomials and their zeros have been a valuable source for investigating various problems in discrete mathematics and related areas.

Apart from the research described above, the zeros of some graph polynomials have been also explored, see, e.g., [21–23]. In this sense, Woodall [23] explored the zeros and zero-free regions of chromatic and flow polynomials. Also, the zero distribution of chromatic and flow polynomials of graphs and characteristic polynomials of matroids have been examined by Jackson [21]. Finally Brešar et al. [24] examined the zeros of cube polynomials under certain structural conditions of the underlying graphs. Other results about the zeros of known graph polynomials have been recently reported by Ellis-Monaghan et al. [4].

The main contribution of this paper is twofold: First, we prove inclusion radii representing upper bounds for the zeros of general complex polynomials. Note that most of these statements can also be applied if the polynomials possess real coefficients as the moduli of the coefficients appear in the corresponding bounds. Second, we apply these and classical results to locate the zeros of special Wiener and distance polynomials, see [25–27]. This results in disks in the complex plane or intervals where the zeros of these polynomials lie. To our best knowledge, the location of zeros of the Wiener and distance polynomial has not been studied yet. Apart from proving results for special polynomials, i.e., the polynomials represent special graph classes, it is easy to generalize the results for other (general) graph polynomials by using the tools we will provide in this paper. Besides further developing the mathematical apparatus, we evaluate the quality of the zero bounds by

generating four large graph classes and interpret the numerical results.

## Results

The main contribution of this paper is to locate the zeros of special graph polynomials which have been proven useful in mathematical chemistry and discrete mathematics, see [3,14,25]. A thorough overview of the underlying theory called *analytic theory of polynomials* can be found in [28,29]. Note that the problem of finding bounds for the zeros of complex and real polynomials has been tackled by numerous authors, e.g., see [28,30–34]. However, the existing research shows that the usefulness and performance of many such bounds has not been demonstrated yet. For this, we compare our bounds in the section ‘Numerical Results’ and demonstrate that some of the new bounds are optimal.

We now start by reproducing some important definitions and results we are going to use in our analysis.

### Mathematical Preliminaries

In this section, we introduce some mathematical preliminaries [25–27,35,36]. Let  $G=(V, E)$  be a finite simple graph and let  $A=(a_{ij})$  be its adjacency matrix.  $I$  denotes the identity matrix. Then,

$$P_{G,A}(z) := \det(A - zI), \quad (1)$$

is the characteristic polynomial of  $G$ . Straightforwardly, we obtain the distance polynomial defined by

$$P_{G,D}(z) := \det(D - zI), \quad (2)$$

where  $D$  is the distance matrix of  $G$ . By expanding the determinant, we yield

$$P_{G,D}(z) = z^n + a_{n-2}z^{n-2} + \cdots + a_1z + a_0. \quad (3)$$

We see that  $a_{n-1}$  is always equal to zero [26]. Denote by  $\rho(G)$  the diameter of  $G$  and  $d(G,i)$  is the number of pairs of  $G$  having distance  $i$ ,  $d(G,1)=|E|$ . Then the Wiener polynomial [25,27] (also called Hosoya polynomial [37]) can be defined as

$$W_G(z) := \sum_{i=1}^{\rho(G)} d(G, i)z^i. \quad (4)$$

Further properties of  $W_G(z)$  have been reported in [27]. Next, we reproduce some results due to Sagan et al. [27] and Krivka [26] giving concrete expressions for Wiener- and distance polynomials for special graph classes.

**Theorem 1** Let  $P_n$ ,  $C_n$  and  $Q_n$  be the path graph, cycle graph and  $n$ -dimensional cube. It holds

$$W_{P_n}(z) = (n-1)z + (n-2)z^2 + \cdots + z^{n-1}, \quad (5)$$

$$W_{C_{2n}}(z) = (2n)(z + z^2 + \cdots + z^{n-1}) + nz^n, \quad (6)$$

$$W_{C_{2n+1}}(z) = (2n+1)(z + z^2 + \cdots + z^n), \quad (7)$$

$$W_{Q_n}(z) = 2^{n-1}\{(1+z)^n - 1\}. \quad (8)$$

**Theorem 2** Let  $K_n$  and  $S_n$  be the complete graph and the star graph on  $n$  vertices. It holds

$$P_{K_n,D}(z) = (z+1)^n(z-n+1), \quad (9)$$

$$P_{S_n,D}(z) = (z+2)^{n-2}[z^2 - 1 - (n-2)(2z+1)]. \quad (10)$$

To introduce the problem of locating the zeros of polynomials, we state the following definitions.

**Definition 1** Let

$$f(z) = \sum_{i=0}^n a_i z^i, a_n \neq 0, a_i \in \mathbb{C}, i=0,1,\dots,n, \quad (11)$$

be complex polynomial. The set

$$K(z_0, r) := \{z \in \mathbb{C} \mid |z - z_0| \leq r\}, \quad (12)$$

represents a circle with central point  $z_0$  and radius  $r$ . Further, we define

$$\hat{K}(z_0, r) := \{z \in \mathbb{C} \mid |z - z_0| < r\}. \quad (13)$$

**Definition 2** If all zeros of  $f(z)$  lie in the set given by Equation (12),  $r$  is called the inclusion radius. In the simplest case,  $r$  is a function of all coefficients, i.e.,  $r=r(a_0, a_1, \dots, a_n)$ .

Note that a more general question namely deriving bounds depending on  $p+1$  coefficients for  $p$  zeros of  $f(z)$  has been tackled by Montel [28,38]. Other variants of bounds and extensions of the results due to Montel can be also found in [28].

### Known Inclusion Radii

In this section, we state some classical and known results for locating the zeros of arbitrary complex-valued polynomials.

**Theorem 3 (Cauchy [28])** Let

$$f(z) = \sum_{i=0}^n a_i z^i, a_n \neq 0, i=0,1,\dots,n, \quad (14)$$

be complex polynomial. All zeros of  $f(z)$  lie in  $K(0, 1 + M_1)$ , where

$$M_1 := \max_{0 \leq j \leq n-1} \left| \frac{a_j}{a_n} \right|. \quad (15)$$

**Theorem 4 (Fujiwara [39])** Let

$$f(z) = \sum_{i=0}^n a_i z^i, a_n \neq 0, i=0,1,\dots,n, \quad (16)$$

be complex polynomial. For  $\lambda_1, \dots, \lambda_n > 0$  and  $\sum_{j=1}^n \frac{1}{\lambda_j} \leq 1$ , all zeros of  $f(z)$  lie in

$$K\left(0, 1 + \max_{1 \leq j \leq n} \left(\frac{|a_{n-j}| \lambda_j}{|a_n|}\right)^{\frac{1}{j}}\right). \quad (17)$$

**Theorem 5 (Enestrom-Kakeya [40])** Let

$$f(z) = a_n z^n + a_{n-1} z^{n-1} + \cdots + a_0, a_i \in \mathbb{R}, i = 0, 1, \dots, n, \quad (18)$$

be a polynomial with real coefficients satisfying

$$a_0 \geq a_1 \geq \cdots \geq a_n > 0. \quad (19)$$

Then, no zeros of  $f(z)$  lie in  $\hat{K}(0, 1)$ .

**Theorem 6 (Dehmer [41])** Let

$$f(z) = a_n z^n + a_{n-1} z^{n-1} + \cdots + a_0, a_n a_{n-1} \neq 0,$$

be a complex polynomial. All zeros of  $f(z)$  lie in the closed disk

$$K\left(0, \frac{1+\phi}{2} + \frac{\sqrt{(\phi-1)^2 + 4M_2}}{2}\right), \quad (20)$$

where

$$\phi := \left| \frac{a_{n-1}}{a_n} \right| \quad \text{and} \quad M_2 := \max_{0 \leq j \leq n-2} \left| \frac{a_j}{a_n} \right|. \quad (21)$$

Besides locating the zeros of polynomials, it is often important to determine the number of positive or negative zeros of polynomials with real coefficients. In this light, we state the famous Descartes Rule of Signs, see [28, 34].

**Theorem 7** Let  $f(z)$  be a real polynomial. The number of positive zeros of  $f(z)$  either equals the number of sign changes within the sequence of coefficients or is less than it by a multiple of two.

## Novel Inclusion Radii

**Theorem 8** Let

$$f(z) = a_n z^n + a_{n-1} z^{n-1} + \cdots + a_0, a_n a_{n-1} \neq 0,$$

be a complex polynomial. All zeros of  $f(z)$  lie in the closed disk

$$K\left(0, \frac{1+\mu}{2} + \frac{\sqrt{(\mu-1)^2 + 4M_3}}{2}\right), \quad (22)$$

where

$$\mu := \left| \frac{a_n - a_{n-1}}{a_n} \right| \quad \text{and} \quad M_3 := \max_{1 \leq j \leq n} \left| \frac{a_{n-j} - a_{n-j-1}}{a_n} \right|, a_{-1} := 0. \quad (23)$$

**Proof:** Defining  $H(z) := (1-z)f(z)$  and assuming  $|z| > 1$  yields

$$|H(z)| = |-a_n z^{n+1} + (a_n - a_{n-1})z^n + \cdots + (a_1 - a_0)z + a_0|, \quad (24)$$

$$\geq |a_n||z|^{n+1} - [|a_n - a_{n-1}||z|^n + \cdots + |a_1 - a_0||z| + |a_0|], \quad (25)$$

$$\geq |a_n| \left[ |z|^{n+1} - \left\{ \frac{|a_n - a_{n-1}|}{|a_n|} |z|^n + M_3 [|z|^{n-1} \cdots + |z| + 1] \right\} \right], \quad (26)$$

$$= |a_n| \left[ |z|^{n+1} - \left\{ \mu |z|^n + M_3 |z|^{n-1} \sum_{i=0}^{n-1} \frac{1}{|z|^i} \right\} \right], \quad (27)$$

$$> |a_n| \left[ |z|^{n+1} - \left\{ \mu |z|^n + M_3 |z|^{n-1} \sum_{i=0}^{\infty} \frac{1}{|z|^i} \right\} \right], \quad (28)$$

$$= |a_n| \left[ |z|^{n+1} - \left\{ \mu |z|^n + M_3 |z|^{n-1} \frac{|z|}{|z|-1} \right\} \right], \quad (29)$$

$$= \frac{|a_n||z|^n}{|z|-1} \left[ |z|^2 - |z|(1+\mu) + (\mu - M_3) \right]. \quad (30)$$

We set

$$F(z) := z^2 - z(1+\mu) + (\mu - M_3), \quad (31)$$

and conclude  $|H(z)| > 0$  if  $F(|z|) > 0$ . To solve  $F(|z|) > 0$ , we yield

$$z_{1,2} := \frac{\mu+1}{2} \pm \frac{\sqrt{(\mu-1)^2 + 4M_3}}{2}, \quad (32)$$

and see that

$$\frac{\mu+1}{2} + \frac{\sqrt{(\mu-1)^2 + 4M_3}}{2} > 1. \quad (33)$$

Altogether, we obtain

$$|f(z)| > 0 \quad \text{if} \quad F(|z|) > 0, \quad (34)$$

and, finally

$$|f(z)| > 0 \quad \text{if} \quad |z| > \frac{\mu+1}{2} + \frac{\sqrt{(\mu-1)^2 + 4M_3}}{2}. \quad (35)$$

By using Inequality (33), it is evident that the zeros with  $|z| \leq 1$  lie in the closed disk represented by Equation (22) too. The theorem is proven for  $H(z)$ . But all zeros of  $f(z)$  are zeros of  $H(z)$ . Hence, the theorem also holds for  $f(z)$ .  $\square$

**Theorem 9** Let

$$f(z) = a_n z^n + a_{n-1} z^{n-1} + \cdots + a_0, a_n \neq 0,$$

be a complex polynomial. Define

$$\mu := \left| \frac{a_n - a_{n-1}}{a_n} \right| \quad \text{and} \quad M_3 := \max_{1 \leq j \leq n} \left| \frac{a_{n-j} - a_{n-j-1}}{a_n} \right|. \quad (36)$$

All zeros of  $f(z)$  lie in the closed disk  $K(0, \max(1, \delta))$  where  $\delta$  denotes the positive root of the equation

$$z^{n+2} - (1 + \mu)z^{n+1} + (\mu - M_3)z^n + M_3 = 0. \quad (37)$$

**Proof:** Defining  $H(z) := (1 - z)f(z)$  yields again

$$|H(z)| \geq |a_n| \left[ |z|^{n+1} - \left\{ \frac{|a_n - a_{n-1}|}{|a_n|} |z|^n + M_3[|z|^{n-1} \dots + |z| + 1] \right\} \right], \quad (38)$$

$$= |a_n| \left[ |z|^{n+1} - \left\{ \mu |z|^n + M_3 \frac{|z|^n - 1}{|z| - 1} \right\} \right], \quad (39)$$

$$= \frac{|a_n|}{|z| - 1} [|z|^{n+2} - |z|^{n+1}(1 + \mu) + |z|^n(\mu - M_3) + M_3]. \quad (40)$$

We set

$$F(z) := z^{n+2} - z^{n+1}(1 + \mu) + z^n(\mu - M_3) + M_3, \quad (41)$$

and see  $|H(z)| > 0$  if  $F(|z|) > 0$ . In both cases, i.e.,  $\mu - M_3 \geq 0$  and  $\mu - M_3 < 0$ ,  $F(z)$  has two sign changes in its sequence of coefficients. By applying Theorem (7) and observing  $F(1) = 0$  and  $F(0) > 0$ , we conclude that  $F(z)$  has exactly two positive zeros. Let  $\delta$  be the zero  $> 1$  and  $\lim_{z \rightarrow +\infty} F(z) = +\infty$ . Altogether, we obtain

$$|f(z)| > 0 \quad \text{if} \quad F(|z|) > 0, \quad (42)$$

and, finally

$$|f(z)| > 0 \quad \text{if} \quad |z| > \max(1, \delta). \quad (43)$$

The proof for  $H(z)$  is complete. But all zeros of  $f(z)$  are zeros of  $H(z)$ . Hence, the theorem also holds for  $f(z)$ .  $\square$

The next theorem is based on using the Hölder inequality [42].

**Theorem 10** Let

$$f(z) = a_n z^n + a_{n-1} z^{n-1} + \dots + a_0, a_n a_{n-1} \neq 0,$$

be a complex polynomial. Let  $p, q > 1$  such that  $\frac{1}{p} + \frac{1}{q} = 1$  and define

$$\mu := \left| \frac{a_n - a_{n-1}}{a_n} \right| \quad \text{and} \quad \theta_1 := \sum_{j=1}^n \left| \frac{a_{n-j} - a_{n-j-1}}{a_n} \right|^p, a_{-1} := 0. \quad (44)$$

All zeros of  $f(z)$  lie in the closed disk  $K(0, \delta)$  where  $\delta > 1$  denotes the largest positive root of the equation

$$(z^q - 1)(z - \mu)^q - \theta_1^{\frac{q}{p}} = 0. \quad (45)$$

**Proof:** We start with  $H(z) := (1 - z)f(z)$  and obtain

$$|H(z)| \geq |a_n| \left[ |z|^{n+1} - \left\{ \mu |z|^n + \sum_{j=1}^n \left| \frac{a_{n-j} - a_{n-j-1}}{a_n} \right| |z|^{n-j} \right\} \right]. \quad (46)$$

By applying the well-known Hölder inequality [42] to  $\sum_{j=1}^n \left| \frac{a_{n-j} - a_{n-j-1}}{a_n} \right| |z|^{n-j}$  and  $|z| > 1$ , we further infer

$$|H(z)| \geq |a_n| \left[ |z|^{n+1} - \left\{ \mu |z|^n + \sum_{j=1}^n \left( \left| \frac{a_{n-j} - a_{n-j-1}}{a_n} \right|^p \right)^{\frac{1}{p}} \left( \sum_{j=1}^n |z|^{(n-j)q} \right)^{\frac{1}{q}} \right\} \right], \quad (47)$$

$$= |a_n| \left[ |z|^{n+1} - \left\{ \mu |z|^n + \theta_1^{\frac{1}{p}} \left( \frac{|z|^{nq} - 1}{|z|^q - 1} \right)^{\frac{1}{q}} \right\} \right], \quad (48)$$

$$> |a_n| \left[ |z|^{n+1} - \left\{ \mu |z|^n + \theta_1^{\frac{1}{p}} \left( \frac{|z|^n}{(|z|^q - 1)^{\frac{1}{q}}} \right) \right\} \right], \quad (49)$$

$$= \frac{|a_n|}{(|z|^q - 1)^{\frac{1}{q}}} \left[ |z|^{n+1} (|z|^q - 1)^{\frac{1}{q}} - \mu |z|^n (|z|^q - 1)^{\frac{1}{q}} - |z|^n \theta_1^{\frac{1}{p}} \right], \quad (50)$$

$$= \frac{|a_n| |z|^n}{(|z|^q - 1)^{\frac{1}{q}}} \left[ (|z|^q - 1)^{\frac{1}{q}} (|z| - \mu) - \theta_1^{\frac{1}{p}} \right]. \quad (51)$$

Hence,  $|H(z)| > 0$  if

$$(|z|^q - 1)^{\frac{1}{q}} (|z| - \mu) - \theta_1^{\frac{1}{p}} > 0, \quad (52)$$

or

$$(|z|^q - 1)(|z| - \mu)^q - \theta_1^{\frac{q}{p}} > 0. \quad (53)$$

Define

$$F(z) := (z^q - 1)(z - \mu)^q - \theta_1^{\frac{q}{p}}. \quad (54)$$

We see easily that the largest positive zero  $\delta$  of  $F(z)$  is  $> 1$ . This implies  $|H(z)| > 0$  if  $F(|z|) > 0$  and, hence,  $|z| > \delta$ . Thus, we proved the theorem for  $H(z)$ . But all zeros of  $f(z)$  are zeros of  $H(z)$ .  $\square$

**Corollary 1** Let

$$f(z) = a_n z^n + a_{n-1} z^{n-1} + \dots + a_0, a_n a_{n-1} \neq 0,$$

be a complex polynomial.  $p, q > 1$  and  $\frac{1}{p} + \frac{1}{q} = 1$ . If  $\mu = 0$  (see Theorem(10)), all zeros of  $f(z)$  lie in the closed disk  $K(0, \delta)$  where  $\delta > 1$  denotes the largest positive root of the equation

$$(z^q - 1)z^q - \theta_1^{\frac{q}{p}} = 0. \quad (55)$$

**Proof:** Set  $\mu=0$  in Equation (54).  $\square$

The following theorem holds for polynomials with real coefficients and was proven to be optimal by using several graph classes (see section ‘Numerical Results’).

**Theorem 11** *Let*

$$f(z) = a_n z^n + a_{n-1} z^{n-1} + \dots + a_0, a_i \in \mathbb{R}, a_n a_{n-1} \neq 0,$$

*be a polynomial with real coefficients. Define*

$$\mu := \left| \frac{a_n - a_{n-1}}{a_n} \right| \quad \text{and} \quad \theta_2 := \frac{1}{\sqrt{2}} \left( \sum_{j=1}^n (a_{n-j} - a_{n-j-1})^2 \right)^{\frac{1}{2}}. \quad (56)$$

*All zeros of  $f(z)$  lie in the closed disk  $K(0, \delta)$  where  $\delta > 1$  denotes the largest positive root of the equation*

$$(z^2 - 1)(z - \mu)^2 - \frac{2\theta_2^2}{|a_n|^2} = 0. \quad (57)$$

**Proof:** Define  $H(z) := (1 - z)f(z)$ . We obtain

$$|H(z)| \geq |a_n| \left[ |z|^{n+1} - \frac{1}{|a_n|} \left\{ |a_n - a_{n-1}| |z|^n + \sum_{j=1}^n (a_{n-j} - a_{n-j-1}) z^{n-j} \right\} \right] \quad (58)$$

$$= |a_n| \left[ |z|^{n+1} - \frac{1}{|a_n|} \left\{ |a_n - a_{n-1}| |z|^n + \sum_{j=1}^n (a_{n-j} - a_{n-j-1}) z^{n-j} \right\} \right] \quad (59)$$

Now, we use De Bruijn’s inequality [42] given by

$$\left| \sum_{j=1}^n a_j z_j \right|^2 \leq \frac{1}{2} \sum_{j=1}^n a_j^2 \left[ \sum_{j=1}^n |z_j|^2 + \sum_{j=1}^n z_j^2 \right], \quad (60)$$

where  $a_j \in \mathbb{R}$  and  $z_j \in \mathbb{C}$ . Applying this inequality to  $|\sum_{j=1}^n (a_{n-j} - a_{n-j-1}) z^{n-j}|$  yields

$$\left| \sum_{j=1}^n (a_{n-j} - a_{n-j-1}) z^{n-j} \right| \leq \frac{1}{\sqrt{2}} \left( \sum_{j=1}^n (a_{n-j} - a_{n-j-1})^2 \right)^{\frac{1}{2}} \left[ \sum_{j=1}^n |z|^{(n-j)2} + \sum_{j=1}^n z^{(n-j)2} \right]^{\frac{1}{2}}, \quad (61)$$

$$\leq \frac{1}{\sqrt{2}} \left( \sum_{j=1}^n (a_{n-j} - a_{n-j-1})^2 \right)^{\frac{1}{2}} \left[ 2 \sum_{j=1}^n |z|^{(n-j)2} \right]^{\frac{1}{2}}, \quad (62)$$

$$= \theta_2 \sqrt{2} \left[ \frac{|z|^{2n} - 1}{|z|^2 - 1} \right]^{\frac{1}{2}}. \quad (63)$$

By using the last inequality and assuming  $|z| > 1$ , we further obtain

$$|H(z)| \geq |a_n| \left[ |z|^{n+1} - \frac{1}{|a_n|} \left\{ |a_n - a_{n-1}| |z|^n + \theta_2 \sqrt{2} \left[ \frac{|z|^{2n} - 1}{|z|^2 - 1} \right]^{\frac{1}{2}} \right\} \right], \quad (64)$$

$$> |a_n| \left[ |z|^{n+1} - \frac{1}{|a_n|} \left\{ |a_n - a_{n-1}| |z|^n + \theta_2 \sqrt{2} \left[ \frac{|z|^n}{(|z|^2 - 1)^{\frac{1}{2}}} \right] \right\} \right], \quad (65)$$

$$= \frac{|a_n|}{(|z|^2 - 1)^{\frac{1}{2}}} \left[ |z|^{n+1} (|z|^2 - 1)^{\frac{1}{2}} - \mu |z|^n (|z|^2 - 1)^{\frac{1}{2}} - \frac{1}{|a_n|} \theta_2 \sqrt{2} |z|^n \right], \quad (66)$$

$$= \frac{|a_n| |z|^n}{(|z|^2 - 1)^{\frac{1}{2}}} \left[ (|z|^2 - 1)^{\frac{1}{2}} (|z| - \mu) - \frac{1}{|a_n|} \theta_2 \sqrt{2} \right]. \quad (67)$$

Thus,  $|H(z)| > 0$  if

$$(|z|^2 - 1)^{\frac{1}{2}} (|z| - \mu) - \frac{1}{|a_n|} \theta_2 \sqrt{2} > 0, \quad (68)$$

or

$$(|z|^2 - 1)(|z| - \mu)^2 - \frac{2\theta_2^2}{|a_n|^2} > 0. \quad (69)$$

Again, we define

$$F(z) := (z^2 - 1)(z - \mu)^2 - \frac{2\theta_2^2}{|a_n|^2}, \quad (70)$$

and easily observe that its largest positive zero  $\delta > 1$ . Finally,  $|H(z)| > 0$  if  $F(|z|) > 0$  and, hence,  $|z| > \delta$ . Thus, we completed the proof for  $H(z)$ . As the zeros of  $f(z)$  are zeros of  $H(z)$ , the proof of the theorem is complete.  $\square$

Now, we easily obtain the following corollaries.

**Corollary 2** *Let*

$$f(z) = a_n z^n + a_{n-1} z^{n-1} + \dots + a_0, a_i \in \mathbb{R},$$

*be a polynomial with real coefficients. All zeros of  $f(z)$  lie in the closed disk  $K(0, \delta)$  where  $\delta > 1$  denotes the largest positive root of the equation*

$$(z^2 - 1)(|a_n|z - |a_{n-1}|)^2 - 2\theta_2^2 = 0. \quad (71)$$

**Proof:** The statement follows from applying the steps of the proof of Theorem (11) to  $f(z)$  (instead of starting with  $H(z) := (1 - z)f(z)$ ).  $\square$

**Corollary 3** Let

$$f(z) = a_n z^n + a_{n-1} z^{n-1} + \cdots + a_0, a_i \in \mathbb{R}, a_n a_{n-1} \neq 0, a_{n-1} \neq 2a_n,$$

be a polynomial with real coefficients. All zeros of  $f(z)$  lie in the closed disk

$$K \left( 0, \sqrt{1 + \left( \frac{\sqrt{2} \cdot \theta_2}{1 - \mu} \right)^2} \right). \quad (72)$$

**Proof:** Using Inequality (67) and  $|z| > 1$  yields

$$|H(z)| > \frac{|a_n| |z|^{n+1}}{(|z|^2 - 1)^{\frac{1}{2}}} \left[ (|z|^2 - 1)^{\frac{1}{2}} - \mu (|z|^2 - 1)^{\frac{1}{2}} - \frac{1}{|a_n|} \theta_2 \sqrt{2} \right]. \quad (73)$$

Now,  $|H(z)| > 0$  if

$$(|z|^2 - 1)^{\frac{1}{2}} - \mu (|z|^2 - 1)^{\frac{1}{2}} - \frac{1}{|a_n|} \theta_2 \sqrt{2} > 0, \quad (74)$$

or

$$|z| > \sqrt{1 + \left( \frac{\sqrt{2} \cdot \theta_2}{1 - \mu} \right)^2}. \quad (75)$$

It holds  $a_n a_{n-1} \neq 0$ . Then,  $\mu \neq 1$  iff  $a_{n-1} \neq 2a_n$ .  $\square$

**Corollary 4** Let

$$f(z) = a_n z^n + a_{n-1} z^{n-1} + \cdots + a_0, a_i \in \mathbb{R}, a_n a_{n-1} \neq 0,$$

be a polynomial with real coefficients. If  $\mu = 0$ , all zeros of  $f(z)$  lie in the closed disk

$$K \left( 0, \sqrt{1 + \frac{2\theta_2^2}{|a_n|^2}} \right). \quad (76)$$

**Proof:** Set  $\mu = 0$  in Inequality (73). The rest of the proof is analogous to the proof of Corollary (3).  $\square$

**Location of Zeros of Graph Polynomials**

By using the tools presented in the previous section, we are now able to derive results for locating the zeros of Wiener and distance polynomials.

**Bounds for Concrete Graph Polynomials**

We start by considering the polynomials provided in section ‘Mathematical Preliminaries and Known Results’ (see Theorem (1)).

**Corollary 5**  $W_{P_n}(z)$ ,  $W_{C_{2n}}(z)$ ,  $W_{C_{2n+1}}(z)$  and  $W_{Q_n}(z)$  do not possess positive zeros.

**Proof:** As there are no sign changes in the sequences of the coefficients of  $W_{P_n}(z)$ ,  $W_{C_{2n}}(z)$  and  $W_{C_{2n+1}}(z)$ , the assertion follows immediately by applying Theorem (7). To prove the statement for  $W_{Q_n}(z)$ , we easily see that

$$W_{Q_n}(z) = 2^{n-1} \{(1+z)^n - 1\} = 2^{n-1} \sum_{i=1}^n \binom{n}{i} z^i. \quad (77)$$

Again by applying Theorem (7),  $W_{Q_n}(z)$  does not possess positive zeros.  $\square$

**Remark 12** The number of negative zeros of these graph polynomials can be determined by applying Theorem (7) to  $f(-z)$ . Particularly,  $W_{Q_n}(-2) = 0$  if  $n$  is even.

Next, we apply the Theorem of Eneström-Kakeya [40] and obtain the following corollary.

**Corollary 6**  $W_{P_n}(z)$  and  $W_{C_{2n}}(z)$  do not possess zeros in  $\hat{K}(0, 1)$ .

To derive a more detailed statement for the zeros of  $W_{C_{2n+1}}(z)$ , we firstly state a lemma.

**Lemma 1** Let

$$f(z) = az^n + az^{n-1} + \cdots + a, a \neq 0, \quad (78)$$

be a complex polynomial. All zeros of  $f(z)$  lie on the unit circle.

**Proof:** Clearly, we have

$$f(z) = a \frac{1 - z^{n+1}}{1 - z} = a \prod_{i=1}^n (z - \omega^i), \quad (79)$$

where  $\omega$  denotes the  $(n+1)$ -th root of unity. The lemma is proven.  $\square$

**Corollary 7** All zeros of  $W_{C_{2n+1}}(z)$  lie on the unit circle.

By applying the classical result due to Cauchy (see Theorem (3)), we obtain

**Corollary 8** All zeros of  $W_{P_n}(z)$ ,  $W_{C_{2n}}(z)$  and  $W_{C_{2n+1}}(z)$  lie in  $K(0, n)$ ,  $K(0, 2n+1)$  and  $K(0, 2n+2)$ , respectively.

By applying Theorem (6), we also yield

**Corollary 9** All zeros of  $W_{P_n}(z)$ ,  $W_{C_{2n}}(z)$  and  $W_{C_{2n+1}}(z)$  lie in

$$K \left( 0, \frac{3}{2} + \frac{\sqrt{1+4(n-1)}}{2} \right), \quad (80)$$

$$K \left( 0, \frac{3}{2} + \frac{\sqrt{1+8n}}{2} \right), \quad (81)$$

and

$$K \left( 0, 1 + \frac{\sqrt{4(2n+1)}}{2} \right), \quad (82)$$

respectively.

For  $n > 3$ , we yield

$$\frac{3}{2} + \frac{\sqrt{1+4(n-1)}}{2} < n, \quad (83)$$

since it is equivalent to

$$\sqrt{1+4(n-1)} < 2n-3, \quad (84)$$

and

$$n^2 - 4n + 3 > 0. \quad (85)$$

This inequality is satisfied for  $n > 3$  and, hence, the inclusion radius given by Equation (80) is always an improvement of  $|z| \leq n$  (see Corollary (8)). This relation can be proven analogously for the other zero bounds too (see Equation (81), (82) and Corollary (8)).

As for  $W_{Q_n}(z)$  no special conditions for its coefficients hold, Eneström-Kakeya's Theorem is not applicable. Theorem (3) and Theorem (6) give general zero bounds for  $W_{Q_n}(z)$ .

**Corollary 10** All zeros of  $W_{Q_n}(z)$  lie in

$$K\left(0, 1 + \max_{1 \leq j \leq n-1} \binom{n}{j}\right), \quad (86)$$

and

$$K\left(0, \frac{1+n}{2} + \frac{\sqrt{(n-1)^2 + 4\left(\max_{1 \leq j \leq n-2} \binom{n}{j}\right)}}{2}\right), \quad (87)$$

respectively.

We notice that the maximum of  $\binom{n}{j}$  is achieved for the middle binomial coefficient  $\binom{n}{\lfloor n/2 \rfloor}$ .

Theorem (11) turned out to be feasible for various graph classes (see section 'Numerical Results'). Hence, we apply this statement to some of the Wiener polynomials of Theorem (1). Note that the bound given by Theorem (11) represents a so-called implicit bound as the bound value is a root of a concomitant polynomial, see, e.g., Equation (57).

**Corollary 11** All zeros of  $W_{C_n}(z)$  lie in the closed disk  $K(0, \delta)$  where  $\delta > 1$  denotes the largest positive root of the equation

$$(z^2 - 1)(z - 1)^2 - 4 = 0. \quad (88)$$

It is  $\delta \doteq 2.08987$ .

**Corollary 12** All zeros of  $W_{C_{n+1}}(z)$  lie in the closed disk  $K(0, \delta)$  where  $\delta > 1$  denotes the largest positive root of the equation

$$(z^2 - 1)z^2 - 1 = 0. \quad (89)$$

It is  $\delta \doteq 1.27202$ .

**Corollary 13** All zeros of  $W_{Q_n}(z)$  lie in the closed disk  $K(0, \delta)$  where  $\delta > 1$  denotes the largest positive root of the equation

$$\begin{aligned} & (z^2 - 1)(z - (n - 1))^2 - \\ & \left[ \left( n - \binom{n}{n-2} \right)^2 + \left( \binom{n}{n-2} - \binom{n}{n-3} \right)^2 \right. \\ & \left. + \cdots + \left( \binom{n}{2} - \binom{n}{1} \right)^2 + n^2 \right] \\ & = (z^2 - 1)(z - (n - 1))^2 - \left[ 2 \binom{2n}{n} - 2 \binom{2n}{n-1} - (n - 2)^2 \right] = 0. \end{aligned}$$

Before applying the results from the previous section to the special distance polynomials presented in Theorem (2), we state a simple lemma.

## Lemma 2

$$P_{K_n, D}(z) = z^{n+1} + \sum_{j=0}^{n-1} \left[ \binom{n}{j} + \binom{n}{j+1} (1-n) \right] z^{j+1} + (1-n), \quad (90)$$

$$P_{S_n, D}(z) = z^n + b_{n-1} z^{n+1} + \cdots + b_1 z + b_0, \quad (91)$$

where

$$b_{n-1} := \binom{n-2}{n-3} 2 + u, \quad (92)$$

$$b_{n-2} := \binom{n-2}{n-4} 2^2 + \binom{n-2}{n-3} 2u + w, \quad (93)$$

$\vdots$

$$b_2 := 2^{n-2} + \binom{n-2}{1} 2^{n-3} u + \binom{n-2}{2} 2^{n-4} w, \quad (94)$$

$$b_1 := 2^{n-2} u + \binom{n-2}{1} 2^{n-3} w, \quad (95)$$

$$b_0 := 2^{n-2} w, \quad (96)$$

$$u := 4 - 2n, \quad (97)$$

$$w := 1 - n. \quad (98)$$

**Proof:** We start with  $P_{K_n, D}(z) = (z+1)^n (z-n+1)$ , see Theorem (1). By performing direct calculations, we get

$$P_{K_n, D}(z) = (z+1)^n z + (1-n)(z+1)^n \quad (99)$$

$$\begin{aligned} & = \left( 1 + \binom{n}{1} z + \cdots + \binom{n}{n-1} z^{n-1} + z^n \right) z \\ & + (1-n) \left( 1 + \binom{n}{1} z + \cdots + \binom{n}{n-1} z^{n-1} + z^n \right), \quad (100) \end{aligned}$$

$$= z^{n+1} + \sum_{j=0}^{n-1} \left[ \binom{n}{j} + \binom{n}{j+1} (1-n) \right] z^{j+1} + (1-n). \quad (101)$$

Now, consider  $P_{S_n, D}(z) = (z+2)^{n-2} [z^2 - 1 - (n-2)(2z+1)]$ . In order to infer Equation (91), we observe

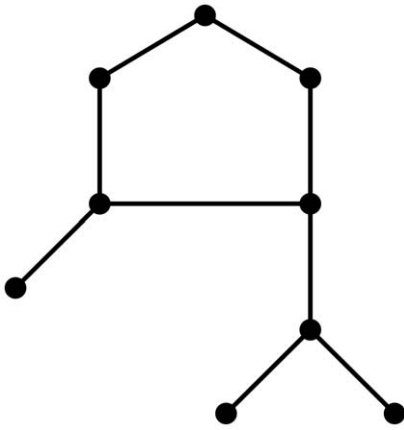

**Figure 1. A graph  $G \in \mathcal{G}_4$ .**  
doi:10.1371/journal.pone.0028328.g001

$$(2+z)^{n-2} = \sum_{j=0}^{n-2} \binom{n-2}{j} 2^{n-2-j} z^j. \quad (102)$$

Also,

$$z^2 - 1 - (n-2)(2z+1) = z^2 + uz + w, \quad (103)$$

where  $u = 4 - 2n$  and  $w = 1 - n$ . If we now define

$$a_0 := 2^{n-2} \binom{n-2}{0} = 2^{n-2}, \quad (104)$$

$$a_1 := 2^{n-3} \binom{n-2}{1}, \quad (105)$$

$\vdots$

$$a_{n-3} := 2^1 \binom{n-2}{n-3}, \quad (106)$$

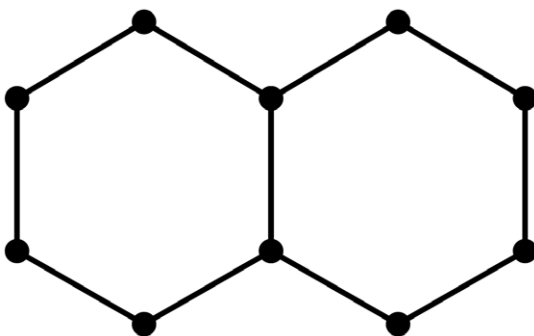

**Figure 2. A graph  $G \in \mathcal{G}_4$ .**  
doi:10.1371/journal.pone.0028328.g002

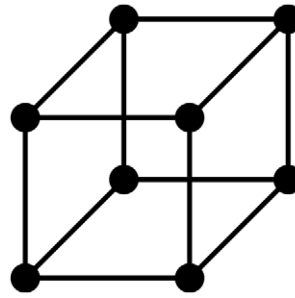

**Figure 3. A graph  $G \in \mathcal{G}_4$ .**  
doi:10.1371/journal.pone.0028328.g003

$$a_{n-2} := 2^0 \binom{n-2}{n-2} = 1, \quad (107)$$

we yield

$$P_{S_n, D}(z) = (z+2)^{n-2} [z^2 - 1 - (n-2)(2z+1)], \quad (108)$$

$$= (z^{n-2} + a_{n-3}z^{n-3} + \dots + a_1z + a_0)(z^2 + uz + w), \quad (109)$$

$$= z^n + (a_{n-3} + u)z^{n-1} + (a_{n-4} + a_{n-3}u + w)z^{n-2} + \dots + (a_0 + a_1u + a_2w)z^2,$$

$$+ (a_0u + a_1w)z + a_0w. \quad (110)$$

With the definitions stated in Lemma (2) and  $a_i$ ,  $0 \leq i \leq n-2$  expressed above, we obtain

$$P_{S_n, D}(z) = z^n + b_{n-1}z^{n-1} + \dots + b_1z + b_0. \quad (111)$$

□

To finalize this section, we now apply some of the classical and new results to the special distance polynomials stated in Lemma (2). Note that these polynomials only possess real zeros as the underlying matrices are symmetric (see Definition (2)). We state the results exemplarily by only considering  $P_{K_n, D}(z)$ .

Using Theorem (3) yields

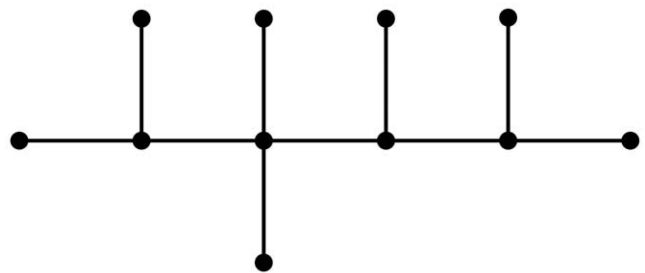

**Figure 4. A graph  $G \in \mathcal{G}_4$ .**  
doi:10.1371/journal.pone.0028328.g004



**Corollary 14** All zeros of  $P_{K_n,D}(z)$  lie in the interval  $[-a, a]$ , where

$$a = 1 + \max \left[ \max_{0 \leq j \leq n-1} \left| \binom{n}{j} + \binom{n}{j+1} (1-n) \right|, n-1 \right]. \quad (112)$$

Applying Theorem (6) yields

**Corollary 15** All zeros of  $P_{K_n,D}(z)$  lie in the interval  $[-a, a]$ , where

$$a = \frac{1}{2} + \sqrt{1 + 4 \cdot \max \left[ \max_{0 \leq j \leq n-2} \left| \binom{n}{j} + \binom{n}{j+1} (1-n) \right|, n-1 \right]}. \quad (113)$$

Finally we apply Theorem (11) and obtain

**Corollary 16** All zeros of  $P_{K_n,D}(z)$  lie in the interval  $[-\delta, \delta]$  where  $\delta > 1$  denotes the largest positive root of the equation

$$(z^2 - 1)z^2 - \left[ \left( 1 - \left[ \binom{n}{n-2} + \binom{n}{n-1} (1-n) \right] \right)^2 + \dots + \left( \left[ \binom{n}{0} + \binom{n}{1} (1-n) \right] - (1-n)^2 + (1-n)^2 \right)^2 \right] = 0. \quad (114)$$

It is evident that by using Lemma (2), similar statements can be derived for  $P_{S_n,D}(z)$ .

## Numerical Results

In this section, we evaluate the quality of the zero bounds presented in the previous sections. Note that this problem is challenging when no sharpness results are available. That means given several bounds and classes of polynomials, we have to judge what kinds of bounds are best for a particular class. To solve this problem analytically might be feasible for bounds which are based on the same concept, e.g., zero bounds as functions of all coefficients which can be calculated explicitly (explicit bounds). But if we consider bounds defined on different concepts, a comparison is often difficult without determining the bounds for concrete polynomials.

To tackle this problem for some zero bounds presented in this paper, we use special graph classes whose graph polynomials and their real and complex-valued zeros can be directly calculated. To generate these graph classes, we have used the well-known Nauty package, see [43]. The package Nauty is a program for computing automorphism groups of graphs and digraphs, written in a highly portable subset of the language C. This package also includes a

**Table 1.** Comparison of the bounds for  $\mathcal{G}_1$ .

| n  | Bound                  | Mean     | St. Deviation | Count best |
|----|------------------------|----------|---------------|------------|
| 10 | Maximum root           | 2.007014 | 0.0           | 657        |
|    | Cauchy (Theorem (3))   | 7.408803 | 6.486541      | 0          |
|    | Theorem (6)            | 5.110194 | 3.261665      | 0          |
|    | Theorem (8)            | 4.220755 | 2.376921      | 0          |
|    | Theorem (9)            | 3.709663 | 1.915489      | 108        |
|    | Theorem (11)           | 3.592285 | 1.845886      | 547        |
|    | Fujiwara (Theorem (4)) | 6.012736 | 4.584253      | 2          |
| 11 | Maximum root           | 2.028913 | 0.0           | 1806       |
|    | Cauchy (Theorem (3))   | 8.236638 | 7.515486      | 0          |
|    | Theorem (6)            | 5.300828 | 3.440242      | 0          |
|    | Theorem (8)            | 4.343894 | 2.487811      | 0          |
|    | Theorem (9)            | 3.835794 | 2.027818      | 468        |
|    | Theorem (11)           | 3.749178 | 1.992102      | 1315       |
|    | Fujiwara (Theorem (4)) | 6.170153 | 4.732012      | 23         |
| 12 | Maximum root           | 2.063067 | 0.0           | 5026       |
|    | Cauchy (Theorem (3))   | 9.129134 | 8.615679      | 0          |
|    | Theorem (6)            | 5.494651 | 3.611637      | 0          |
|    | Theorem (8)            | 4.473329 | 2.594855      | 0          |
|    | Theorem (9)            | 3.967472 | 2.136432      | 1514       |
|    | Theorem (11)           | 3.910585 | 2.131267      | 3446       |
|    | Fujiwara (Theorem (4)) | 6.333819 | 4.874544      | 62         |
| 13 | Maximum root           | 2.103169 | 0.0           | 13999      |
|    | Cauchy (Theorem (3))   | 10.06646 | 9.773008      | 0          |
|    | Theorem (6)            | 5.684568 | 3.772948      | 0          |
|    | Theorem (8)            | 4.599854 | 2.689574      | 0          |
|    | Theorem (9)            | 4.095588 | 2.231771      | 5087       |
|    | Theorem (11)           | 4.068939 | 2.259367      | 8684       |
|    | Fujiwara (Theorem (4)) | 6.488192 | 5.005889      | 220        |

doi:10.1371/journal.pone.0028328.t001

**Table 2.** Comparison of the bounds for  $\mathcal{G}_2$ .

| n | Bound                  | Mean      | St. Deviation | Count best |
|---|------------------------|-----------|---------------|------------|
| 7 | Maximum root           | 2.751998  | 0.0           | 853        |
|   | Cauchy (Theorem (3))   | 5.471599  | 3.603993      | 0          |
|   | Theorem (6)            | 4.665022  | 2.360952      | 1          |
|   | Theorem (8)            | 4.461638  | 1.919881      | 1          |
|   | Theorem (9)            | 3.870582  | 1.459967      | 11         |
|   | Theorem (11)           | 3.71606   | 1.351209      | 839        |
|   | Fujiwara (Theorem (4)) | 6.887799  | 5.225005      | 4          |
| 8 | Maximum root           | 3.641017  | 0.0           | 11117      |
|   | Cauchy (Theorem (3))   | 6.74994   | 4.194339      | 0          |
|   | Theorem (6)            | 5.762259  | 2.535831      | 1          |
|   | Theorem (8)            | 5.460469  | 2.016927      | 1          |
|   | Theorem (9)            | 4.876477  | 1.553454      | 298        |
|   | Theorem (11)           | 4.74001   | 1.457854      | 10811      |
|   | Fujiwara (Theorem (4)) | 8.955896  | 6.841888      | 9          |
| 9 | Maximum root           | 4.970174  | 0.0           | 261080     |
|   | Cauchy (Theorem (3))   | 8.22829   | 4.572521      | 0          |
|   | Theorem (6)            | 7.135768  | 2.561838      | 1          |
|   | Theorem (8)            | 6.780506  | 1.999698      | 1          |
|   | Theorem (9)            | 6.198375  | 1.535316      | 12046      |
|   | Theorem (11)           | 6.083267  | 1.460323      | 248967     |
|   | Fujiwara (Theorem (4)) | 11.705689 | 8.867751      | 68         |

doi:10.1371/journal.pone.0028328.t002

suite of programs called gtools for efficiently generating and processing small non-isomorphic graphs (stored in graph6 format) with various constraints, such as the number of vertices, edges, maximum/minimum vertex degree, connectedness, etc. Now we define the graph classes as follows:

- $\mathcal{G}_1$ : Unicyclic graphs with  $10, \dots, 13$  vertices.  $|\mathcal{G}_1| = 21488$ .
- $\mathcal{G}_2$ : Connected graphs with  $7, \dots, 9$  vertices.  $|\mathcal{G}_2| = 273050$ .
- $\mathcal{G}_3$ : Bicyclic graphs. with  $9, \dots, 12$  vertices.  $|\mathcal{G}_3| = 41216$ .
- $\mathcal{G}_4$ : Trees with  $13, \dots, 16$  vertices.  $|\mathcal{G}_4| = 31521$ .

Note that a tree is a connected graph without cycles, or a connected graph with exactly  $|E| = |V| - 1$  edges. A unicyclic graph is a connected graph with exactly one cycle, or a connected graph with exactly  $|E| = |V|$  edges. Analogously, a bicyclic graph is a connected graph with exactly two cycles, or a connected graph with exactly  $|E| = |V| + 1$  edges. These simple types of graphs have often been used in mathematical chemistry and as underlying structure of chemical compounds. From these characterizations, the most important structural properties of our graph classes are known. Some characteristic graphs from the graph classes  $\mathcal{G}_1$ ,  $\mathcal{G}_2$ ,  $\mathcal{G}_3$  and  $\mathcal{G}_4$  are depicted in Figure (1)–(4).

The numerical results are presented in Table (1)–Table (4).  $n$  denotes the number of vertices. The mean and standard deviation have been calculated based on the values for the particular graph class. ‘Count best’ stands for the number of graphs for which the particular bound is the best one among all considered bounds. Among the bounds presented in this paper, we also calculated the bound due to Fujiwara [39], see Theorem (4). The first line in each group is ‘Maximum root’, which stands for the statistics regarding the maximum root of distance polynomial computed with 10 digit precision. Note that these values are used for the comparison with other bounds and ‘Count best’ is exactly the number of graphs in the group. Because of ties, the sum of the numbers in the column ‘Count best’ does not need to match up with ‘Count best’ for ‘Maximum root’ row.

It is not surprising that Cauchy’s bound (see Theorem (3)) often gives non-feasible values if  $M_1$  is large. An example for this is the polynomial  $f(z) := z^3 + 4z^2 + 1000z + 99$ ,  $M_1 = 1000$ . Then Cauchy’s bound (see Theorem (3)) gives the closed disk  $K(0, 1001)$ . That means the inclusion radius equals 1001 but, in fact, the largest modulus of the zeros of  $f(z)$  (maximum root) is  $z_{\max} \doteq 31,616$ . This proves that the resulting bound value is not in accordance with the real location of the zeros of this given polynomial.

**Table 3.** Comparison of the bounds for  $\mathcal{G}_3$ .

| n  | Bound                  | Mean     | St. Deviation | Count best |
|----|------------------------|----------|---------------|------------|
| 9  | Maximum root           | 2.22706  | 0.0           | 797        |
|    | Cauchy (Theorem (3))   | 7.298504 | 6.051353      | 0          |
|    | Theorem (6)            | 5.279362 | 3.200967      | 0          |
|    | Theorem (8)            | 4.4397   | 2.362881      | 0          |
|    | Theorem (9)            | 3.924488 | 1.895787      | 134        |
|    | Theorem (11)           | 3.796987 | 1.811045      | 658        |
|    | Fujiwara (Theorem (4)) | 6.537748 | 4.913553      | 5          |
| 10 | Maximum root           | 2.180459 | 0.0           | 2678       |
|    | Cauchy (Theorem (3))   | 8.143751 | 7.218366      | 0          |
|    | Theorem (6)            | 5.447246 | 3.437328      | 0          |
|    | Theorem (8)            | 4.525308 | 2.522573      | 0          |
|    | Theorem (9)            | 4.014815 | 2.061737      | 609        |
|    | Theorem (11)           | 3.918314 | 2.016088      | 2045       |
|    | Fujiwara (Theorem (4)) | 6.60265  | 5.032024      | 24         |
| 11 | Maximum root           | 2.182083 | 0.0           | 8833       |
|    | Cauchy (Theorem (3))   | 9.025023 | 8.296308      | 0          |
|    | Theorem (6)            | 5.631895 | 3.627826      | 0          |
|    | Theorem (8)            | 4.638066 | 2.639716      | 0          |
|    | Theorem (9)            | 4.130523 | 2.179354      | 2737       |
|    | Theorem (11)           | 4.069533 | 2.173708      | 6029       |
|    | Fujiwara (Theorem (4)) | 6.732582 | 5.180786      | 67         |
| 12 | Maximum root           | 2.209132 | 0.0           | 28908      |
|    | Cauchy (Theorem (3))   | 9.9542   | 9.412301      | 0          |
|    | Theorem (6)            | 5.820146 | 3.793567      | 0          |
|    | Theorem (8)            | 4.761158 | 2.739752      | 0          |
|    | Theorem (9)            | 4.2557   | 2.279321      | 10390      |
|    | Theorem (11)           | 4.228459 | 2.306858      | 18211      |
|    | Fujiwara (Theorem (4)) | 6.882458 | 5.316112      | 302        |

doi:10.1371/journal.pone.0028328.t003

**Table 4.** Comparison of the bounds for  $\mathcal{G}_4$ .

| n  | Bound                  | Mean      | St. Deviation | Count best |
|----|------------------------|-----------|---------------|------------|
| 13 | Maximum root           | 2.013052  | 0.0           | 1301       |
|    | Cauchy (Theorem (3))   | 9.120055  | 8.891774      | 0          |
|    | Theorem (6)            | 5.368856  | 3.55083       | 0          |
|    | Theorem (8)            | 4.326742  | 2.506002      | 0          |
|    | Theorem (9)            | 3.821249  | 2.051564      | 392        |
|    | Theorem (11)           | 3.773694  | 2.058365      | 882        |
|    | Fujiwara (Theorem (4)) | 6.045571  | 4.656         | 22         |
| 14 | Maximum root           | 2.047998  | 0.0           | 3159       |
|    | Cauchy (Theorem (3))   | 10.015765 | 10.009886     | 0          |
|    | Theorem (6)            | 5.550602  | 3.709817      | 0          |
|    | Theorem (8)            | 4.450377  | 2.604708      | 0          |
|    | Theorem (9)            | 3.946445  | 2.151         | 1164       |
|    | Theorem (11)           | 3.926453  | 2.188239      | 1929       |
|    | Fujiwara (Theorem (4)) | 6.188467  | 4.773453      | 59         |
| 15 | Maximum root           | 2.077108  | 0.0           | 7741       |
|    | Cauchy (Theorem (3))   | 10.922225 | 11.134163     | 0          |
|    | Theorem (6)            | 5.722803  | 3.863504      | 0          |
|    | Theorem (8)            | 4.566722  | 2.699576      | 0          |
|    | Theorem (9)            | 4.063896  | 2.245945      | 3166       |
|    | Theorem (11)           | 4.070977  | 2.312517      | 4384       |
|    | Fujiwara (Theorem (4)) | 6.317809  | 4.882851      | 179        |
| 16 | Maximum root           | 2.10139   | 0.0           | 19320      |
|    | Cauchy (Theorem (3))   | 11.862751 | 12.311891     | 0          |
|    | Theorem (6)            | 5.88555   | 4.013454      | 0          |
|    | Theorem (8)            | 4.674308  | 2.791324      | 0          |
|    | Theorem (9)            | 4.17225   | 2.337896      | 8904       |
|    | Theorem (11)           | 4.206391  | 2.433625      | 9917       |
|    | Fujiwara (Theorem (4)) | 6.42628   | 4.974219      | 477        |

doi:10.1371/journal.pone.0028328.t004

Interestingly, the implicit bounds given by Theorem (9) and Theorem (11) clearly outperform the other zero bounds. These statements show even better performance than the bound given by Theorem (6) that has been proven better than other classical results, see [31,44]. Finally we observe (see Table (1)–Table (4)) that Theorem (11) is the best for all graph classes. In particular, we see that the concomitant polynomial of Theorem (11) has degree four. This is a great advantage in practice, since we can use explicit formulas for the largest root of polynomial of degree four and establish sharp upper bounds for the largest root of a distance polynomial.

Generally, we point out that this paper does not deal with calculating the zeros of complex or real polynomials numerically, see [45]. This problem and the task we dealt with in our paper can not be compared directly as locating the zeros of a polynomial, e.g., to determine zero bounds does not necessarily require to compute the zeros numerically. For example, Cauchy's bound (see Theorem (3)) and other explicit ones can be determined immediately without using any algorithms, e.g., the method due to Lehmer-Schur to calculate zeros explicitly. Also, many problems do not require to calculate all zeros explicitly as estimations for the zeros are often adequate, e.g., when determining a bound of the largest eigenvalue of a characteristic polynomial, see [16]. But in fact, the analytical methods such as bounds can be useful for using numerical approaches properly as the bound values could be used as starting values.

## Summary and Conclusion

In this paper we have explored the location of zeros of special graph polynomials. Apart from locating the zeros of chromatic and flow polynomials [21,23], this problem has not yet been investigated extensively for other types of graph polynomials. In this study, we applied classical and new results to locate the zeros of Wiener and distance polynomials representing special graph classes, see [25–27]. Clearly, similar statements can be easily obtained for general forms for these polynomials. Also, further

theorems can be established by using suitable inequalities from the mathematical literature.

We point out that some of the gained zero bounds might be more practicable than existing results. For example, the root of the concomitant polynomial of Theorem (11) that has degree four can be determined much easier (by hand) than the root of an algebraic equation having degree  $n$ . Interestingly, this bound turned out to be optimal for the considered graph classes. Note that zero-free regions for these polynomials could be easily obtained. We will tackle this problem as future work.

The next step was to evaluate the quality of the obtained zero bounds. This is crucial as some practical applications require sharp inclusion radii. Generally, to evaluate the quality of zero bounds relates to determine the bounds by using concrete polynomials or classes thereof. Clearly, it might be difficult to compare explicit and implicit bounds analytically. Thus to derive statements for their optimality, the bounds must be calculated explicitly. In this study, we tackled the problem by using the graph classes  $\mathcal{G}_1, \dots, \mathcal{G}_4$  and found that Theorem (9) and Theorem (11) are optimal (see Table (1)–Table (4)). As future work, we will perform further studies to explore the optimality of zero bounds. Also, we want to study this problem theoretically and derive optimality statements for certain graph classes.

The meaning of the complex zeros of the Wiener polynomial is not yet understood. To tackle this problem in the future, it would be interesting to use also directed networks for exploring relationships between the complex zeros and certain structural properties of the underlying directed networks, e.g., the *information flow*. Apart from this problem, it would be worthwhile to explore the zero distribution of the Wiener polynomial. A starting point to do so could be employing the seminal work of Schmidt and Schur [34,46].

## Author Contributions

Wrote the paper: MD AI. Generated the numerical results: AI.

## References

- Bonchev D, Rouvray DH (1991) Chemical Graph Theory. Introduction and Fundamentals. Abacus Press. New York, NY, USA.
- Dong FM, Koh KM, Teo KL (2005) Chromatic Polynomials and Chromaticity of Graphs. World Scientific Publishing Company. New Jersey, NJ, USA.
- Gutman I (1991) Polynomials in graph theory. In: Bonchev D, Rouvray DH, eds. Chemical Graph Theory, Introduction and Fundamentals, Abacus Press, 133–176. New York, NY, USA.
- Ellis-Monaghan JA, Merino C (2010) Graph polynomials and their applications I: The Tutte polynomial. In: Dehmer M, ed. Structural Analysis of Complex Networks. Boston/Basel: Birkhäuser. pp 219–255.
- Gutman I, Harary F (1983) Generalizations of the matching polynomial. *Utilitas Mathematica* 24: 97–106.
- Birkhoff GD (1912) A determinant formula for the number of ways of coloring a map. *The Annals of Mathematics* 14: 42–46.
- Diudea MV (2010) Nanomolecules and Nanostructures. Polynomials and Indices. Mathematical Chemistry Monographs. University of Kragujevac and Faculty of Science Kragujevac. Kragujevac, Serbia.
- Emmert-Streib F (2006) Algorithmic computation of knot polynomials of secondary structure elements of proteins. *Journal of Computational Biology* 13: 1503–1512.
- Wiener H (1947) Structural determination of paraffin boiling points. *Journal of the American Chemical Society* 69: 17–20.
- Yan W, Yang BY, Yeh Y (2007) The behavior of Wiener indices and polynomials of graphs under five graph decorations. *Applied Mathematics Letters* 18: 290–295.
- Zadeh HS, Hamzeh A, Ashrafi AR (2009) Wiener-type invariants of some graph operations. *Filomat* 23: 103–113.
- Polansky OE, Bonchev D (1986) The Wiener number of graphs. I. General theory and changes due to graph operations. *MATCH Communications in Mathematical and in Computer Chemistry* 21: 133–186.
- AbuGhneim OA, Al-Ezeh H, Al-Ezeh M (2007) The Wiener polynomial of the  $k$ -th power graph. *International Journal of Mathematics and Mathematical Sciences* Article ID 24873, doi:10.1155/2007/24873.
- Ivanciuc O, Ivanciuc T, Diudea MV (1999) Polynomials and spectra of molecular graphs. *Roumanian Chemical Quarterly Reviews* 7: 41–67.
- Gutman I, Polansky OE (1986) Mathematical Concepts in Organic Chemistry Springer.
- Lovász L, Pelikán J (1973) On the eigenvalues of trees. *Periodica Mathematica Hungarica* 3: 175–182.
- Randić M, Vracko M, Novic M (2001) Eigenvalues as molecular descriptors. In: Diudea MV, ed. QSPR/QSAR Studies by Molecular Descriptors, Nova Publishing 93–120. Huntington, NY, USA.
- Bonchev D (1995) Topological order in molecules 1. Molecular branching revisited. *Journal of Molecular Structure: THEOCHEM* 336: 137–156.
- Todeschini R, Consonni V, Mannhold R (2002) Handbook of Molecular Descriptors. Wiley-VCH. Weinheim, Germany.
- Dehmer M, Sivakumar L, Varmuza K (2012) Uniquely discriminating molecular structures using novel eigenvalue-based descriptors. *MATCH Communications in Mathematical and in Computer Chemistry* 67: 147–172.
- Jackson B (2003) Zeros of chromatic and flow polynomials of graphs. *Journal of Geometry* 76: 95–109.
- Kovše M (2009) Counting cubes in median graphs and related problems. In: Analysis of Complex Networks: From Biology to Linguistic, Wiley VCH, 323–350. Weinheim, Germany.
- Woodall D (1992) A zero-free interval for chromatic polynomials. *Discrete Mathematics* 101: 333–341.
- Brešar B, Klavžar S, Skrekovski R (2006) Roots of cube polynomials of median graphs. *Journal of Graph Theory* 52: 37–50.
- Hosoya H (1988) On some counting polynomials. *Discrete Applied Mathematics* 19: 239–257.
- Křivka P, Trinajstić N (1983) On the distance polynomial of a graph. *Applications of Mathematics* 28: 357–363.
- Sagan BE, Yeh YN, Zhang P (1996) The Wiener polynomial of a graph. *International Journal of Quantum Chemistry* 60: 959–969.
- Marden M (1966) Geometry of polynomials. Mathematical Surveys of the American Mathematical Society, Vol. 3. Rhode Island, USA.

29. Rahman QI, Schmeisser G (2002) *Analytic Theory of Polynomials*. Critical Points, Zeros and Extremal Properties. Clarendon Press. Oxford, UK.
30. Dehmer M (2004) *Die analytische Theorie der Polynome*. Nullstellenschranken für komplexwertige Polynome. Weissensee-Verlag. Berlin, Germany.
31. Jain VK (1986) On the zeros of polynomials II. *Journal of Mathematical and Physical Sciences* 20: 259–267.
32. Joyal A, Labelle G, Rahman QI (1967) On the location of polynomials. *Canadian Mathematical Bulletin* 10: 53–63.
33. Mignotte M, Stefanescu D (1999) *Polynomials: An Algorithmic Approach*. Discrete Mathematics and Theoretical Computer Science. Springer. Singapore.
34. Obreschkoff N (1963) *Verteilung und Berechnung der Nullstellen reeller Polynome*. Hochschulbücher für Mathematik, Vol. 55. VEB Deutscher Verlag der Wissenschaften. Berlin, Germany.
35. Cvetković DM, Doob M, Sachs H (1980) *Spectra of Graphs. Theory and Application*. Deutscher Verlag der Wissenschaften. Berlin, Germany.
36. Harary F (1969) *Graph Theory*. Addison Wesley Publishing Company. Reading, MA, USA.
37. Lepović M, Gutman I (1998) A collective property of trees and chemical. *Journal of Chemical Information and Computer Sciences* 38: 823–826.
38. Montel P (1923) Sur les modules des zéros des polynômes. *Annales Scientifiques de l'École Normale Supérieure* 40: 1–34.
39. Fujiwara M (1916) Über die obere Schranke des absoluten Betrages der Wurzeln einer algebraischen Gleichung. *Tôhoku Mathematical Journal* 10: 167–171.
40. Takeya S (1912) On the limits of the roots of an algebraic equation with positive coefficients. *Tôhoku Mathematical Journal* 2: 140–142.
41. Dehmer M, Mowshowitz A (2011) Bounds on the moduli of polynomial zeros. *Applied Mathematics and Computation* accepted, doi:10.1016/j.amc.2011.09.043.
42. Cerone P, Dragomir SS (2010) *Mathematical Inequalities*. CRC Press. Boca Raton, FL, USA.
43. McKay BD (2010) Nauty. <http://cs.anu.edu.au/~bdm/nauty/>.
44. Kojima J (1914) On a theorem of Hadamard and its applications. *Tôhoku Mathematical Journal* 5: 54–60.
45. Householder AS (1970) *The Numerical Treatment of a single Nonlinear Equation*. McGraw-Hill. New York, NY, USA.
46. Schur I (1933) Untersuchungen über algebraische Gleichungen I: Bemerkungen zu einem Satz von E. Schmidt. *Sitzungsberichte der Preussischen Akademie der Wissenschaften Physikalisch-mathematische Klasse*, Berlin 7: 403–428.
